# Supplementary material
Source: PubMed Central journal article supplement (PMC2447664)
Supplement: M706453200_1.pdf [file M706453200_1.pdf]

### **SUPPORTING DATA AVAILABLE**

Fig. 1. Dynamic Light Scattering data to illustrate the consistency of the recombinant wild type  $\alpha$ B-crystallin.

Fig. 2. Native gel electrophoresis illustrating the difference in relative mobility for wild type, Q151X/ wild type and Q151X  $\alpha$ B-crystallin. These data further highlight the effect of the Q151X mutation upon the ability of  $\alpha$ B-crystallin to form oligomeric complexes.

Fig. 3 and 4. Complete data set for the Citrate synthase (Fig. 3) and Insulin (Fig. 4) chaperone assay. See legend in Fig. 6 and Materials and Methods for experimental details.

A

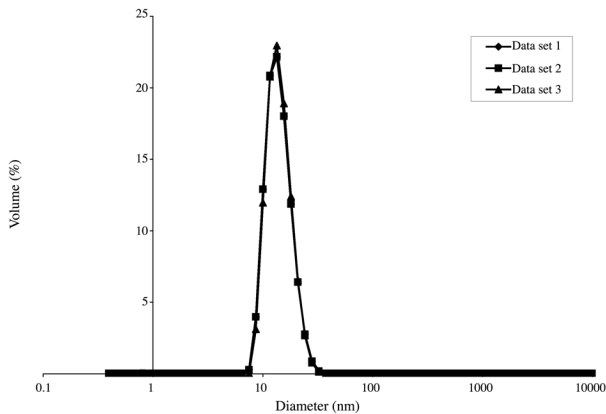

B

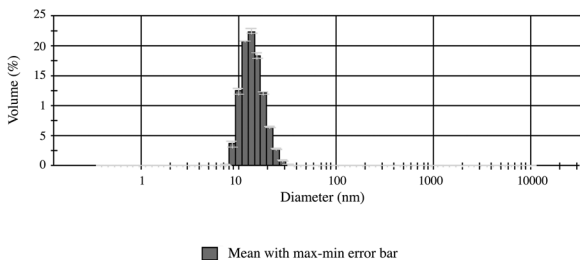

C

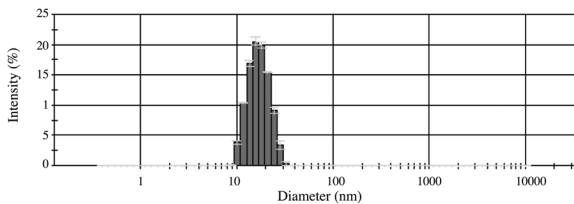

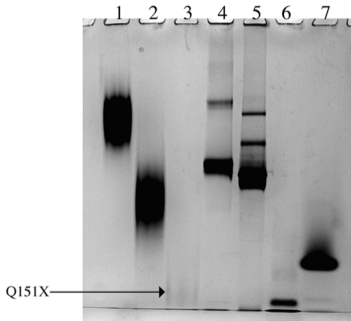

| Lane | Sample Details                         | Molecular Weight (kDa) |
|------|----------------------------------------|------------------------|
| 1    | Wild Type $\alpha$ B-crystallin        | 564                    |
| 2    | Q151X/ Wild Type $\alpha$ B-crystallin | 442                    |
| 3    | Q151X                                  | 18                     |
| 4    | Thyroglobulin                          | 725                    |
| 5    | GroEL                                  | 700                    |
| 6    | BSA                                    | 62                     |
| 7    | Carbonic anhydrase                     | 29                     |

Supplementary Fig. 2

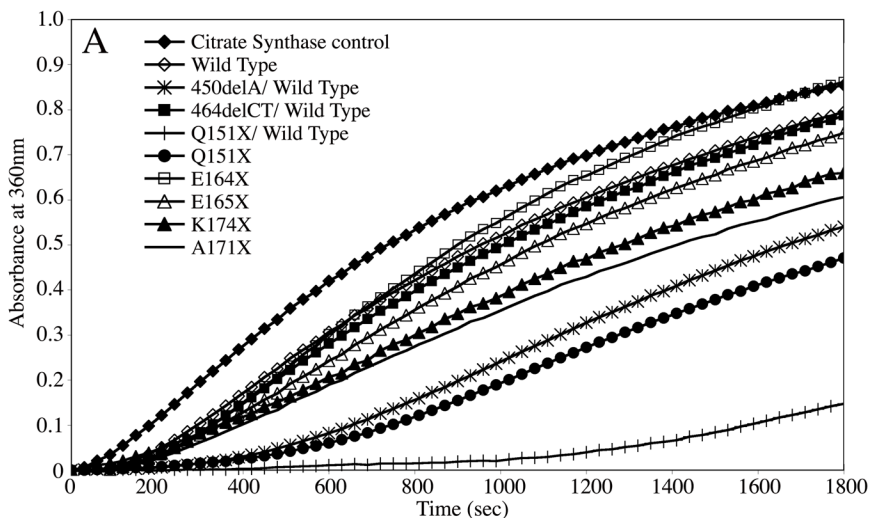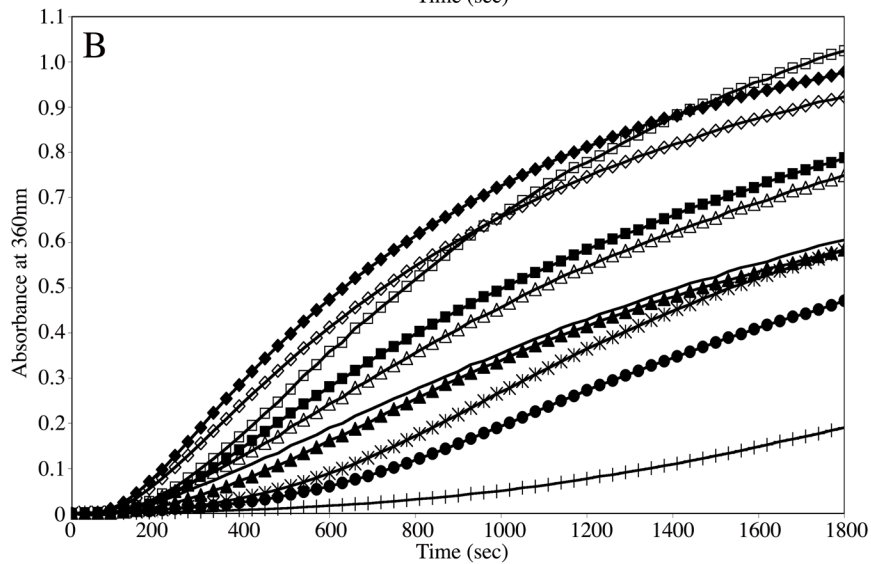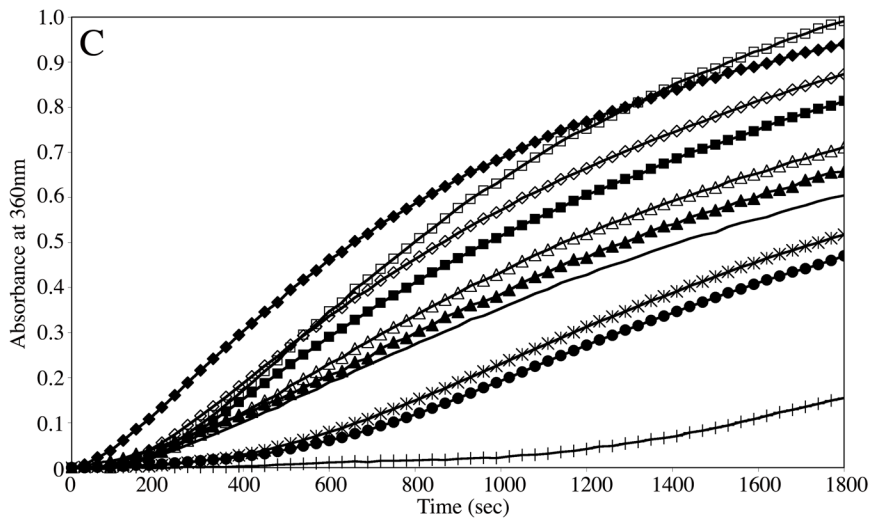

Supplementary Fig. 3

**A**

- ◆ Insulin control
- ◇ Wild Type
- \* 450delA/ Wild Type
- 464delCT/ Wild Type
- + Q151X/ Wild Type
- Q151X
- E164X
- △ E165X
- ▲ K174X
- A171X

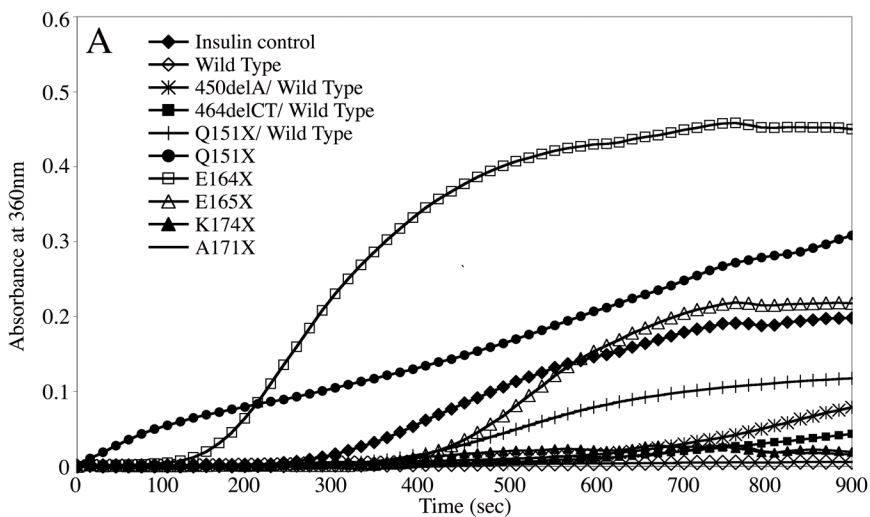**B**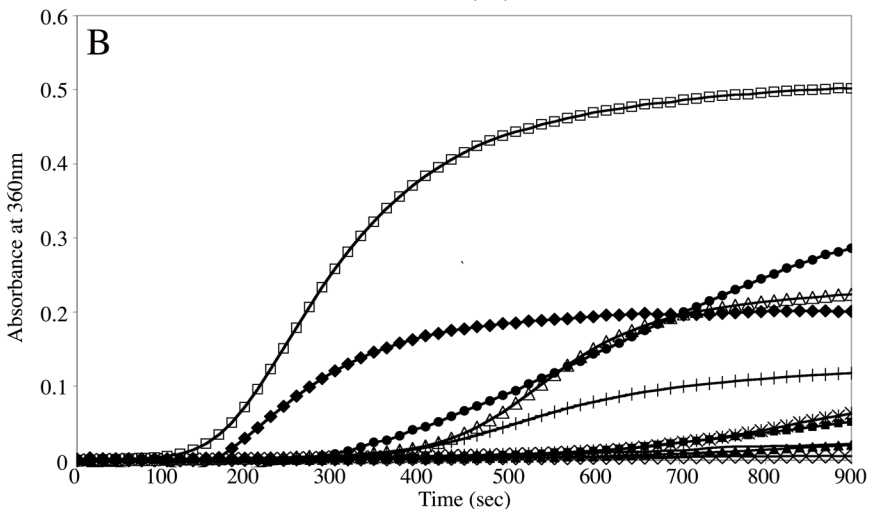**C**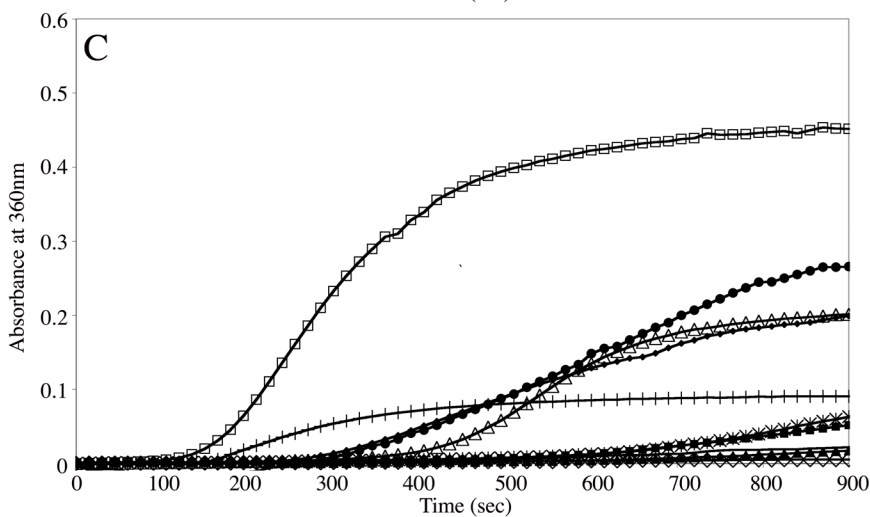

Supplementary Fig. 4
